Development 135, 2681 (2008) doi:10.1242/dev.026310

## Notch resolves mixed neural identities in the zebrafish epiphysis

**Elise Cau, Aurelie Quillien and Patrick Blader**

There was an error published in *Development* **135**, 2391-2401.

In the first paragraph of the Materials and methods section, the units of concentration of the morpholinos injected should be mg/ml.

The authors apologise to readers for this mistake.
